# Supplementary material
Source: publisher site journal article supplement (https://www.dovepress.com/article/425342)
Supplement: Supplementary file 1 [file get_supplementary_file.php]

**Supplementary Table 1: At-risk Asthma Patients Presented to National University Polyclinics (NUPs) in 2018**

| <b>National University Polyclinic (NUP)</b>                                     | <b>Pioneer Polyclinic</b> | <b>Choa Chu Kang Polyclinic</b> | <b>Clementi Polyclinic</b> | <b>Bukit Batok Polyclinic</b> | <b>Jurong Polyclinic</b> | <b>Total</b> |
|---------------------------------------------------------------------------------|---------------------------|---------------------------------|----------------------------|-------------------------------|--------------------------|--------------|
| <b>Number of all asthma visits</b>                                              | 2131                      | 4691                            | 3360                       | 3662                          | 3821                     | 17665        |
| <b>Number of asthma visits needing nebulisation</b>                             | 277                       | 850                             | 308                        | 398                           | 452                      | 2285         |
| <b>Proportion of asthma visits needing nebulisation (%)</b>                     | 13.00                     | 18.12                           | 9.17                       | 10.87                         | 11.83                    | 12.94        |
| <b>Number of asthma visits requiring <math>\geq 2</math> nebulisation (SAE)</b> | 150                       | 584                             | 147                        | 227                           | 209                      | 1317         |
| <b>Proportion of high-risk asthma visits (%)</b>                                | 7.04                      | 12.45                           | 4.38                       | 6.20                          | 5.47                     | 7.46         |
| <b>Number of asthma visits requiring <math>\geq 6</math> ventolin cannister</b> | 13                        | 36                              | 21                         | 37                            | 45                       | 152          |
| <b>Proportion of super-high-risk asthma visits (%)</b>                          | 0.61                      | 0.77                            | 0.63                       | 1.01                          | 1.18                     | 0.86         |

Note: SAE = Severe asthma exacerbation requiring urgent nebulisation at polyclinic.

**Supplementary Table 2: Demographic Characteristics of Asthma Patients by Care Setting**

| <b>Demographic Characteristics</b> | <b>Polyclinics [32]<br/>(n=559)</b> | <b>ED [31]<br/>(n=674)</b> |
|------------------------------------|-------------------------------------|----------------------------|
| <b>Age (years)</b>                 |                                     |                            |
| Mean (SD)                          | 48.3 (16.6)                         | 43(1)                      |
| Range                              | 12.0–91.0                           | NA                         |
| <b>Age groups (years)</b>          |                                     |                            |
| 12–17                              | 27 (4.8)                            | NA                         |
| 18–54                              | 317 (56.7)                          | NA                         |
| ≥55                                | 215 (38.5)                          | NA                         |
| <b>Sex</b>                         |                                     |                            |
| Female                             | 402 (71.9)                          | 330 (49)                   |
| Male                               | 157 (28.1)                          | 344 (51)                   |

Note: Data are presented as n (%) unless otherwise specified.
